# Supplementary material
Source: PubMed Central journal article supplement (PMC8976781)
Supplement: NIHMS1771180-supplement-supinfo2.pdf [file NIHMS1771180-supplement-supinfo2.pdf]

# The Journal of Physiology Statistical Summary Document

**Manuscript Title:** TRPV1 in arteries enables a rapid myogenic tone

**Authors:** Thieu X. Phan, Hoai T. Ton, Hajnalka Gulyás, Róbert Pórszász, Attila Tóth, Rebekah Russo, Matthew W. Kay, Niaz Sahibzada and Gerard P. Ahern

**Animal model used, if applicable** C57BL6 wild-type and TRPV1-null mice and Wistar and Sprague-Dawley rats

**Underlying hypothesis:**

**Definitions of 'n':**

n refers to number of animals/arteries/cells.

**Statistical summary table:**

| Experimental question number* | Finding/conclusion                                | Experimental location/variable<br>e.g. cortex vs cerebellum or genotype | Data comparisons<br>e.g. WT vs KO              | Mean value (or other summary statistic)     | SD                                          | Units | n (number of arteries/cells/animals) | P**                      | Statistical test | Any other variable<br>e.g. subjects' age or sex | Figure/table in which data are presented | Comments<br>e.g. observed or |
|-------------------------------|---------------------------------------------------|-------------------------------------------------------------------------|------------------------------------------------|---------------------------------------------|---------------------------------------------|-------|--------------------------------------|--------------------------|------------------|-------------------------------------------------|------------------------------------------|------------------------------|
|                               | BCTC dilates skeletal muscle arteries via TRPV1   | Pressurized arteries                                                    | WT<br>KO                                       | 35.80602<br>2.49018                         | 10.43791<br>2.147802                        | %     | 3 mice (4 arteries)                  | 0.0080                   | Nested t-test    |                                                 | Fig 1B                                   |                              |
|                               | AMG517 dilates skeletal muscle arteries via TRPV1 | Pressurized arteries                                                    | WT<br>KO                                       | 34.89682<br>4.205057                        | 23.38224<br>2.672904                        | %     | 3 mice (3 arteries)                  | 0.0016                   | t-test, unpaired |                                                 | Fig 1D                                   |                              |
|                               | BCTC does not dilate mesenteric arteries          | Pressurized arteries                                                    | WT (BCTC)<br>WT (KCl)                          | 2.48204<br>-57.4312                         | 4.961487<br>15.88456                        | %     | 4 arteries (4 mice)                  | 0.7640<br>0.0002         | t-test, unpaired |                                                 | Fig 1F                                   |                              |
|                               | BCTC dilates in vivo arteries                     | Intravital                                                              | WT (BCTC)<br>KO (BCTC)<br>WT (KCl)<br>KO (KCl) | 38.45987<br>2.13411<br>61.84612<br>67.24672 | 6.42052<br>4.473331<br>6.143179<br>5.390591 | %     | 5 mice (5 arteries)                  | 0.00008831<br>0.20122614 | t-test, unpaired |                                                 | Fig 2B                                   |                              |

The Journal of  
**Physiology** Statistical Summary Document

|  |                                                |                    |                                    |                                              |                                              |           |                                            |                                        |                                       |  |        |  |
|--|------------------------------------------------|--------------------|------------------------------------|----------------------------------------------|----------------------------------------------|-----------|--------------------------------------------|----------------------------------------|---------------------------------------|--|--------|--|
|  | BCTC dose-dependently dilates in vivo arteries | Intravital         | Control<br>0.3<br>1.0<br>3.0       | 0.615821<br>0.740523<br>0.853182<br>0.896321 | 0.020344<br>0.080135<br>0.055677<br>0.0562   | Fract ion | 4 arteries (4 mice)                        | 0.02444816<br>0.00022920<br><0.0001    | One-way ANOVA<br>Tukey's Multi. comp. |  | Fig 2D |  |
|  | BCTC dilates skeletal muscle arteries          | Intravital         | Medium and small diameter arteries | 39.83683<br>54.59394                         | 6.442589<br>6.579126                         | %         | 5 arteries (4 mice)<br>8 arteries (5 mice) | 0.002218                               | t-test, unpaired                      |  | Fig 2E |  |
|  | Resting tone                                   | Intravital         | Medium and small diameter arteries | 37.50144<br>46.94252                         | 5.0441<br>6.829841                           | %         | 4 arteries (4 mice)<br>5 arteries (4 mice) | 0.048044                               | t-test, unpaired                      |  | Fig 2F |  |
|  | BCTC increases coronary perfusion              | Isolated rat heart | Control and treatment              | 14.25296<br>621.028                          | 4.500067<br>296.398                          | ml/min.s  | 5 rats                                     | 0.0018                                 | t-test, unpaired                      |  | FIG 3B |  |
|  | BCTC does not alter steady-state heart rate    | Isolated rat heart | Control and treatment              | 281.6735<br>283.9274                         | 21.43018<br>19.35162                         | bpm       | 5 rats                                     | 0.874842                               | t-test, unpaired                      |  | FIG 3C |  |
|  | BCTC/SNP decrease systemic BP in rat (dose)    | RAT (DIA, SYS)     | Dose (0.03; 0.1; 0.3; 1.0)         | 3.184<br>-0.426<br>-5.948<br>-20.778         | 1.892678<br>4.001516<br>3.368192<br>4.046544 | mm Hg     | 5 rats                                     | 0.17560200<br>0.02010027<br>0.00023063 | One-way ANOVA<br>Tukey's Multi. comp. |  | FIG 4B |  |
|  |                                                |                    |                                    | 3.184<br>-0.426<br>-5.948<br>-20.778         | 1.892678<br>4.001516<br>3.368192<br>4.046544 |           |                                            | 0.05270178<br>0.01849842<br>0.00050428 |                                       |  |        |  |



The Journal of  
**Physiology** Statistical Summary Document

|  |                                               |                          |                              |                                                          |                                                         |     |                     |                                                              |                                    |  |  |  |        |
|--|-----------------------------------------------|--------------------------|------------------------------|----------------------------------------------------------|---------------------------------------------------------|-----|---------------------|--------------------------------------------------------------|------------------------------------|--|--|--|--------|
|  | BCTC decrease systemic BP in RTX treated mice | Mouse (SYS, DIA, MAP)    | BCTC Control (DIA, SYS, MAP) | 88.47644<br>115.2109<br>97.38793                         | 3.897514<br>4.234861<br>3.416286                        |     |                     |                                                              |                                    |  |  |  |        |
|  |                                               |                          | Treatment (DIA, SYS, MAP)    | 71.96207<br>102.8361<br>82.25342                         | 3.518895<br>3.075774<br>2.225586                        |     | 5 mice              | 0.00000118<br>0.00010357<br>0.00000501                       | t-test, unpaired                   |  |  |  | FIG 4F |
|  | BCTC does not acutely change HR               | HR                       | Control WT<br>Treatment WT   | 636.9884<br>608.3058                                     | 44.4489<br>51.30342                                     |     |                     | 0.3250                                                       |                                    |  |  |  |        |
|  |                                               |                          | Control KO<br>Treatment KO   | 572.4317<br>560.5236                                     | 59.04784<br>50.77621                                    | bpm | 6 mice              | 0.7158                                                       | t-test, unpaired                   |  |  |  | FIG 4G |
|  | BCTC increases HR after 5 min                 | HR                       | Control<br>Treatment         | 601.6914<br>672.345                                      | 27.49864<br>34.06389                                    | bpm | 4 mice              | 0.0176                                                       | t-test, unpaired                   |  |  |  | FIG 4I |
|  | Myogenic tone at 20, 40, 60, 80, 100 mmHg     | skeletal muscle arteries | WT                           | 8.561519<br>13.70206<br>22.40182<br>33.2379<br>39.34806  | 3.23711<br>2.103144<br>2.232566<br>4.103836<br>3.481853 |     |                     |                                                              |                                    |  |  |  |        |
|  |                                               |                          | WT + BCTC                    | 8.124501<br>10.85864<br>14.08234<br>15.81591<br>17.93432 | 1.49867<br>2.295249<br>1.645578<br>1.325535<br>2.938253 | %   | 3 mice (3 arteries) | >0.999999<br>>0.992468<br>0.0118<br>0.00022939<br>0.00000001 | One-way ANOVA Tukey's Multi. comp. |  |  |  | FIG 5D |
|  |                                               |                          | TRPV1-null                   | 7.833402<br>13.97354<br>21.11865<br>30.34135             | 2.317243<br>2.943404<br>3.398901<br>3.288179            |     |                     | >0.9999999<br>>0.9999999<br>0.99999911                       |                                    |  |  |  |        |

The Journal of  
**Physiology** Statistical Summary Document

|  |                                        |                          |                                                                          |                                                                      |                                                                                         |   |                     |                                                                                                 |                                       |  |  |        |
|--|----------------------------------------|--------------------------|--------------------------------------------------------------------------|----------------------------------------------------------------------|-----------------------------------------------------------------------------------------|---|---------------------|-------------------------------------------------------------------------------------------------|---------------------------------------|--|--|--------|
|  |                                        |                          | TRPV1-null<br>+ BCTC                                                     | 36.05223<br>8.373332<br>11.48333<br>20.83333<br>29.73000<br>34.29667 | 2.94392<br>3.171141<br>2.645191<br>3.915869<br>6.242764<br>5.871544                     |   |                     | 0.97293909<br>>0.9999999<br>9<br>0.99998676<br>>0.9999999<br>9<br>>0.9999999<br>9<br>0.99999995 |                                       |  |  |        |
|  | T <sub>1/2</sub> for tone              | skeletal muscle arteries | WT<br><br><br><br><br><br>TRPV1-null                                     | 172<br>108<br>64<br>42.66<br><br>42.66<br>100<br>94.66<br>74         | 12<br>18.3303<br>10.58301<br>8.326664<br><br>12.2202<br>10.58301<br>12.8582<br>9.165151 | s | 3 mice (3 arteries) | 0.9966229<br>0.9899879<br>0.0332<br>0.0118                                                      | One-way ANOVA<br>Tukey's Multi. comp. |  |  | FIG 5E |
|  | T <sub>1/2</sub> for recovery tone (s) | skeletal muscle arteries | WT<br>TRPV1-null                                                         | 57.33333<br>150.3333                                                 | 9.291573<br>13.79613                                                                    | s | 3 mice (3 arteries) | 0.0006                                                                                          | t-test, unpaired                      |  |  | FIG 6B |
|  | T <sub>1/2</sub> for recovery tone (s) | skeletal muscle arteries | WT<br>TRPV1-null (Big arteries)<br><br>WT<br>TRPV1-null (Small arteries) | 29.294<br>64.6<br><br>16.2<br>47.5                                   | 6.438624<br>6.228965<br><br>1.643168<br>4.434712                                        | s | 3 mice (5 arteries) | 0.0023<br><br>0.0315                                                                            | Nested t-test                         |  |  | FIG 6C |



The Journal of  
**Physiology** Statistical Summary Document

|  |                                                                                                        |                          |                                                                       |                                                              |                                                               |      |                                                                                                                                        |                                                          |                  |  |      |  |
|--|--------------------------------------------------------------------------------------------------------|--------------------------|-----------------------------------------------------------------------|--------------------------------------------------------------|---------------------------------------------------------------|------|----------------------------------------------------------------------------------------------------------------------------------------|----------------------------------------------------------|------------------|--|------|--|
|  | Myogenic tone at 80 mmHg                                                                               | skeletal muscle arteries | Control<br>0 Ca <sup>2+</sup><br>Nif<br>BCTC<br>9-Phen<br>9-Phen+BCTC | 37.22457<br>0<br>8.754813<br>20.8445<br>26.31549<br>7.525086 | 8.005731<br>0<br>2.360206<br>7.340872<br>7.583201<br>2.390831 | %    | 6 mice (6 arteries)<br>6 mice (6 arteries)<br>4 mice (4 arteries)<br>6 mice (6 arteries)<br>4 mice (4 arteries)<br>4 mice (4 arteries) | <0.0001<br><0.0001<br>0.00261338<br>0.0496506<br><0.0001 | t-test, unpaired |  | 7E   |  |
|  | Arterial dilation following 40 s constriction evoked by KCl                                            | skeletal muscle arteries | WT<br>+BCTC<br>TRPV1-null                                             | 37.95101<br>1.353535<br>10.37655                             | 4.517157<br>1.814343<br>4.799506                              | %    | 5 mice (5 arteries)<br>5 mice (5 arteries)<br>4 mice (4 arteries)                                                                      | <0.0001<br><0.0001                                       | t-test, unpaired |  | 8C   |  |
|  | T1/2 for recovery tone (s)                                                                             | skeletal muscle arteries | WT<br>TRPV1-null                                                      | 61.93667<br>293.3333                                         | 8.007573<br>12.2202                                           | s    | 3 mice (3 arteries)                                                                                                                    | 0.00001050                                               | t-test, unpaired |  | 8C   |  |
|  | Dilation of medium-diameter (~60 μm) and small (~25 μm) arteries in response to 6 s application of KCl | skeletal muscle arteries | WT<br>~60 μm<br>~25 μm<br>TRPV1-null<br>~60 μm<br>~25 μm              | 33.43<br>55.38911<br>4.972356<br>19.29903                    | 3.145966<br>9.279433<br>4.972356<br>8.584285                  | %    | 3 mice (3 arteries)<br>5 mice (5 arteries)<br>4 mice (4 arteries)<br>4 mice (4 arteries)                                               | 0.00001301<br>0.00157494                                 | t-test, unpaired |  | 8F   |  |
|  | [Ca <sup>2+</sup> ] increases in SMCs                                                                  | skeletal muscle arteries | WT<br>WT+BCTC<br>TRPV1-null<br>WT (at 23°C)                           | 1.97037<br>1.20639<br>1.164923<br>1.143298                   | 0.085038<br>0.053339<br>0.033939<br>0.07433                   | F/F0 | (47 cells)<br>(35 cells)<br>(30 cells)<br>(28 cells)<br>3 mice                                                                         | 0.0021<br>0.0047<br>0.0050                               | Nested t-test    |  | 9B,C |  |
|  | [Ca <sup>2+</sup> ] increases in arteries denuded of endothelium                                       | skeletal muscle arteries | WT<br>WT+BCTC                                                         | 1.63278<br>2.863949<br>1.438347<br>1.964777                  | 0.33632<br>0.067503<br>0.022495<br>0.03696                    | F/F0 | (51 cells)<br>(29 cells)<br>4 mice                                                                                                     | 0.0055<br>0.0087                                         | Nested t-test    |  | 9E   |  |

The Journal of  
**Physiology** Statistical Summary Document

|  |                                                        |                          |            |                     |                      |   |                     |                  |                    |  |         |
|--|--------------------------------------------------------|--------------------------|------------|---------------------|----------------------|---|---------------------|------------------|--------------------|--|---------|
|  | BCTC dilates pressurized, denuded arteries             | skeletal muscle arteries | WT         | 8.280497<br>0.33632 | 1.002263<br>5.317553 | % | 4 arteries (4 mice) |                  | Nested t-test      |  | 9F      |
|  |                                                        |                          | WT+BCTC    | 13.0194<br>18.8664  | 2.695062<br>3.994979 |   |                     | 0.0117<br>0.0005 |                    |  |         |
|  | Changes in diameter of pressurized arteries at 80 mmHg | skeletal muscle arteries | WT         |                     |                      | % |                     |                  |                    |  |         |
|  |                                                        |                          | U73343     | 3.188072            | 4.042399             |   | 4 mice (4 arteries) | 0.999759         |                    |  |         |
|  |                                                        |                          | U73122     | 37.85547            | 9.471528             |   | 4 mice (5 arteries) | 0.001059         |                    |  |         |
|  |                                                        |                          | Nif        | 44.67708            | 13.83954             |   | 3 mice (4 arteries) | 0.000170         |                    |  |         |
|  |                                                        |                          | GX1092003X | 37.60581            | 6.603166             |   | 4 mice (4 arteries) | 0.0000005        |                    |  |         |
|  |                                                        |                          | TRPV1 null |                     |                      | % |                     |                  | Nested 1 way ANOVA |  | Fig 10B |
|  |                                                        |                          | U73343     | 4.226716            | 5.843728             |   | 4 mice (4 arteries) | 0.98460          |                    |  |         |
|  |                                                        |                          | U73122     | 35.34996            | 15.26672             |   | 4 mice (5 arteries) | 0.00020          |                    |  |         |
|  |                                                        |                          | Nif        | 46.93400            | 16.44336             |   | 3 mice (4 arteries) | 0.00114          |                    |  |         |
|  |                                                        |                          | GX 092003X | 39.94000            | 7.145533             |   | 4 mice (4 arteries) | 0.00056          |                    |  |         |

\*\* Authors may wish to make the text bold where p is considered significant against a stated confidence limit
